# Supplementary material for: A ZnIIcomplex of ornidazole with decreased nitro radical anions that is still highly active onEntamoeba histolytica
Source: Royal Society of Chemistry journal article supplement (doi:10.1039/d0ra02597f), 2020-01-01
Supplement: d0ra02597f1.pdf [file d0ra02597f1.pdf]

## Supplementary Information to the manuscript

A Zn<sup>II</sup> complex of Ornidazole with decreased nitro radical anion is still very active on

*Entamoeba histolytica*

<sup>a</sup>Promita Nandy, <sup>b</sup>Soumen Singha <sup>c</sup>Neha Banyal, <sup>c</sup>Kasturi Mukhopadhyay, <sup>b</sup>Sanjay Kumar  
and <sup>a</sup>Saurabh Das\*

<sup>a</sup>Department of Chemistry, Inorganic Section, Jadavpur University, Kolkata – 700 032, India.

<sup>a</sup>Department of Physics, Inorganic Section, Jadavpur University, Kolkata – 700 032, India.

<sup>b</sup>School of Environmental Sciences, Jawaharlal Nehru University, New Delhi – 110067, India.

E-mail: dasrsv@yahoo.in

Equations for evaluating binding constant for the interaction of Zn(Onz)<sub>2</sub>Cl<sub>2</sub> with calf thymus DNA

$$\frac{1}{\Delta I} = \frac{1}{\Delta I_{max}} + \frac{K_d}{\Delta I_{max}(C_D - C_0)} \quad (SE 1)$$

$$K_d = \frac{\left[ C_0 - \left( \frac{\Delta I}{\Delta I_{max}} \right) C_0 \right] \left[ C_D - \left( \frac{\Delta I}{\Delta I_{max}} \right) C_0 \right]}{\left( \frac{\Delta I}{\Delta I_{max}} \right) C_0} \quad (SE 2)$$

$$C_0 \left( \frac{\Delta I}{\Delta I_{max}} \right)^2 - (C_0 + C_D + K_d) \left( \frac{\Delta I}{\Delta I_{max}} \right) + C_D = 0 \quad (SE 3)$$

$$\frac{r}{C_f} = K (n - r) \quad (\text{SE } 4)$$

### UV-Vis spectra of Ornidazole and Zn<sup>II</sup>-Ornidazole in different solvents

Fig. S1

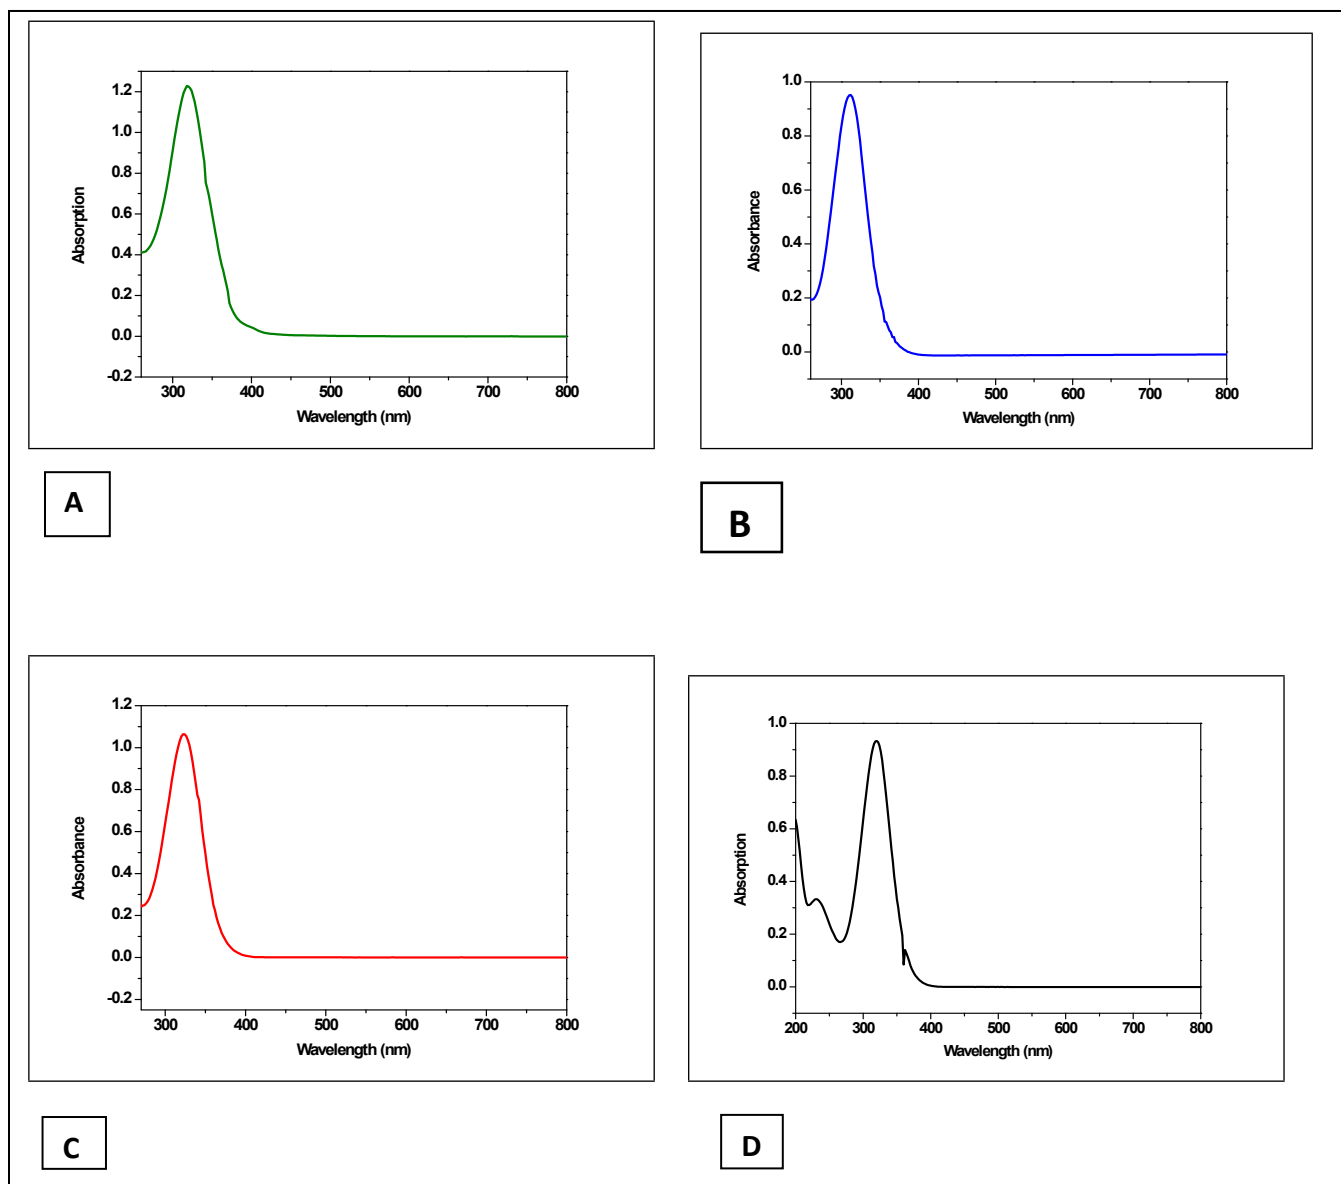

Fig. S1: UV-Vis spectra of Onz in A) water, B) methanol, C) DMF and D) acetonitrile

**Fig. S2**

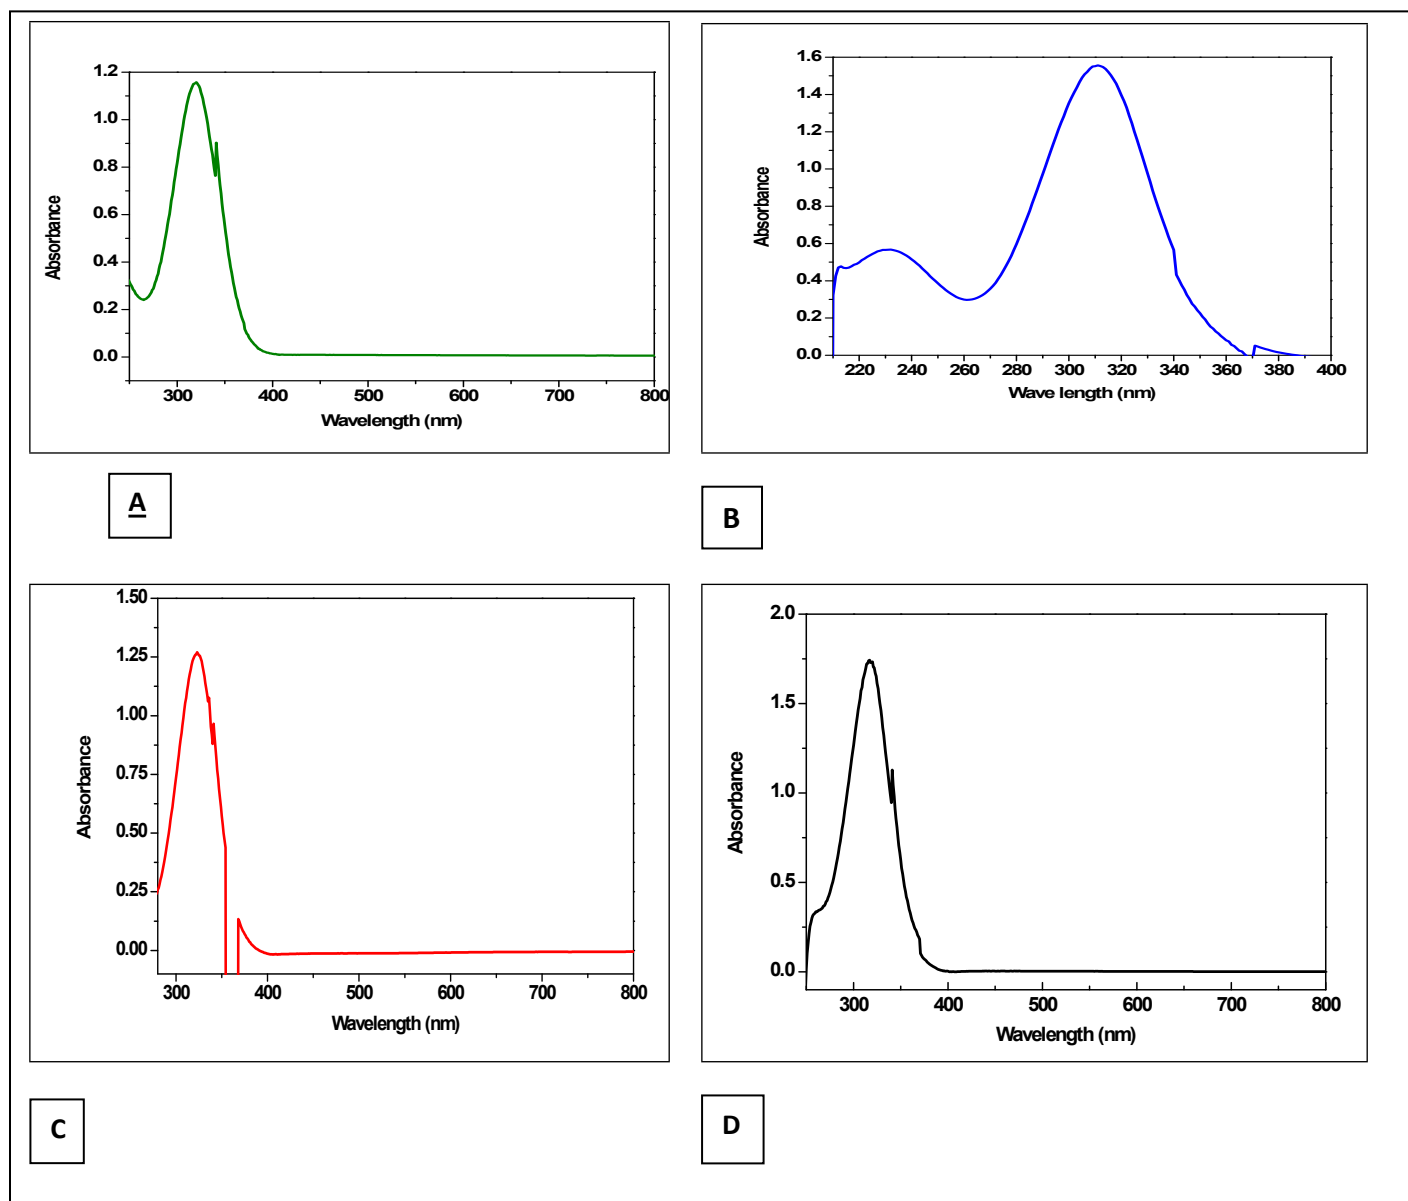

**Fig. S2: UV-Vis spectra of Zn(Onz)<sub>2</sub>Cl<sub>2</sub> in A) water, B) methanol, C) DMF, D) acetonitrile**

**Table S1: IR stretching frequencies of Ornidazole and Zn(Onz)<sub>2</sub>Cl<sub>2</sub>**

| <b>Functional group</b>                | <b>IR bands (values in cm<sup>-1</sup>)</b> |                                            |
|----------------------------------------|---------------------------------------------|--------------------------------------------|
|                                        | <b>Onz</b>                                  | <b>[Zn(Onz)<sub>2</sub>Cl<sub>2</sub>]</b> |
| <b>C=N</b>                             | <b>1538.21</b>                              | <b>1565.80</b>                             |
| <b>NO<sub>2</sub> (ν<sub>s</sub>)</b>  | <b>1385.92</b>                              | <b>1380.48</b>                             |
| <b>NO<sub>2</sub> (ν<sub>as</sub>)</b> | <b>1471.60</b>                              | <b>1482.00</b>                             |

**Fig. S3**

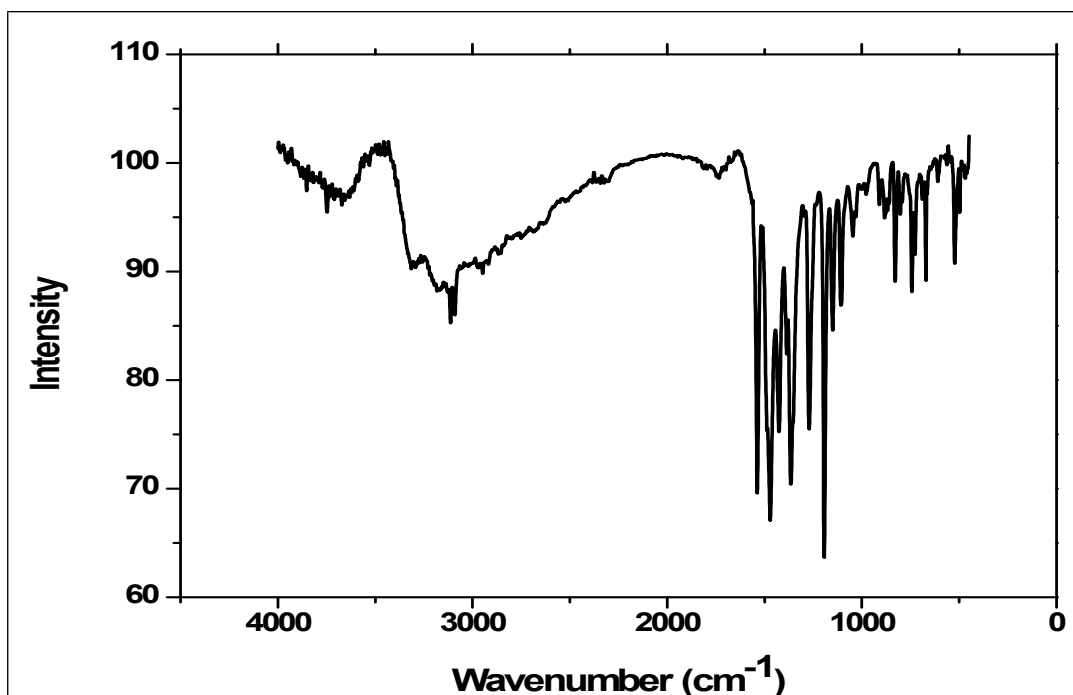

Fig. S3: IR spectrum of Onz

Fig. S4

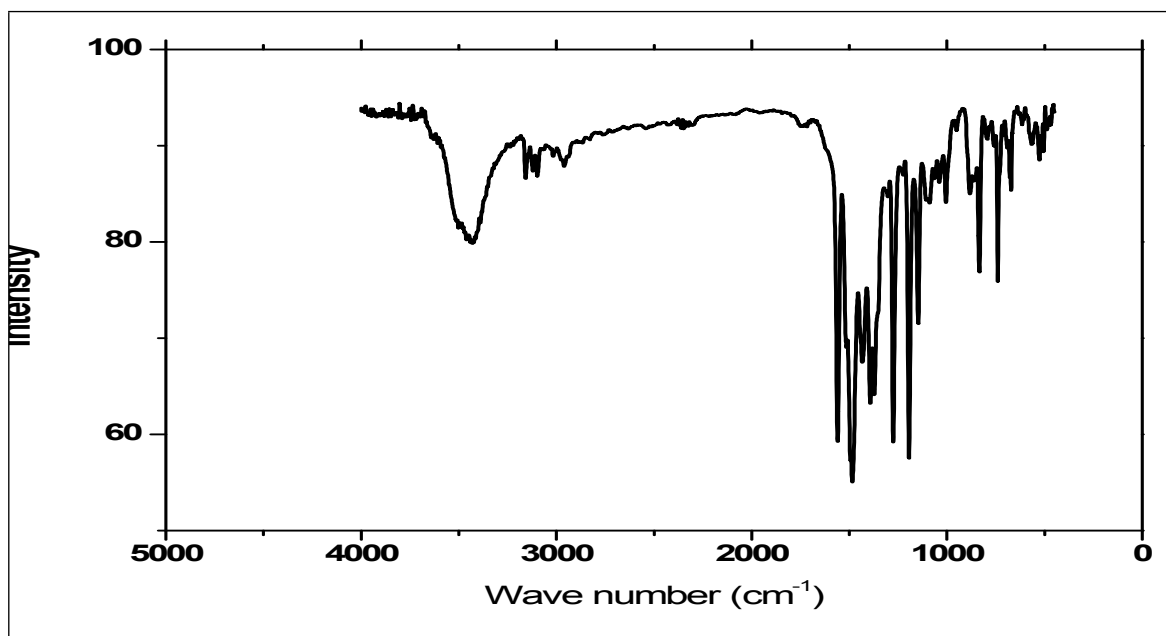

Fig. S4: IR spectrum of [Zn(Onz)<sub>2</sub>Cl<sub>2</sub>]



|                                                                                                                                         |                                                                                                                                         |
|-----------------------------------------------------------------------------------------------------------------------------------------|-----------------------------------------------------------------------------------------------------------------------------------------|
| 536.9795: C <sub>14</sub> H <sub>20</sub> <sup>35</sup> Cl <sub>3</sub> N <sub>6</sub> O <sub>6</sub> <sup>64</sup> Zn;                 | 538.9766: C <sub>14</sub> H <sub>20</sub> <sup>35</sup> Cl <sub>2</sub> <sup>37</sup> ClN <sub>6</sub> O <sub>6</sub> <sup>64</sup> Zn; |
| 540.9737: C <sub>14</sub> H <sub>20</sub> <sup>35</sup> Cl <sup>37</sup> Cl <sub>2</sub> N <sub>6</sub> O <sub>6</sub> <sup>64</sup> Zn | 542.9708: C <sub>14</sub> H <sub>20</sub> <sup>37</sup> Cl <sub>3</sub> N <sub>6</sub> O <sub>6</sub> <sup>64</sup> Zn                  |
| 538.9764: C <sub>14</sub> H <sub>20</sub> <sup>35</sup> Cl <sub>3</sub> N <sub>6</sub> O <sub>6</sub> <sup>66</sup> Zn;                 | 540.9735: C <sub>14</sub> H <sub>20</sub> <sup>35</sup> Cl <sub>2</sub> <sup>37</sup> ClN <sub>6</sub> O <sub>6</sub> <sup>66</sup> Zn; |
| 542.9706: C <sub>14</sub> H <sub>20</sub> <sup>35</sup> Cl <sup>37</sup> Cl <sub>2</sub> N <sub>6</sub> O <sub>6</sub> <sup>66</sup> Zn | 544.9677: C <sub>14</sub> H <sub>20</sub> <sup>37</sup> Cl <sub>3</sub> N <sub>6</sub> O <sub>6</sub> <sup>66</sup> Zn                  |
| 539.9795: C <sub>14</sub> H <sub>20</sub> <sup>35</sup> Cl <sub>3</sub> N <sub>6</sub> O <sub>6</sub> <sup>67</sup> Zn;                 | 541.9746: C <sub>14</sub> H <sub>20</sub> <sup>35</sup> Cl <sub>2</sub> <sup>37</sup> ClN <sub>6</sub> O <sub>6</sub> <sup>67</sup> Zn; |
| 543.9717: C <sub>14</sub> H <sub>20</sub> <sup>35</sup> Cl <sup>37</sup> Cl <sub>2</sub> N <sub>6</sub> O <sub>6</sub> <sup>67</sup> Zn | 545.9688: C <sub>14</sub> H <sub>20</sub> <sup>37</sup> Cl <sub>3</sub> N <sub>6</sub> O <sub>6</sub> <sup>67</sup> Zn                  |
| 540.9752: C <sub>14</sub> H <sub>20</sub> <sup>35</sup> Cl <sub>3</sub> N <sub>6</sub> O <sub>6</sub> <sup>66</sup> Zn;                 | 542.9723: C <sub>14</sub> H <sub>20</sub> <sup>35</sup> Cl <sub>2</sub> <sup>37</sup> ClN <sub>6</sub> O <sub>6</sub> <sup>66</sup> Zn; |
| 544.9694: C <sub>14</sub> H <sub>20</sub> <sup>35</sup> Cl <sup>37</sup> Cl <sub>2</sub> N <sub>6</sub> O <sub>6</sub> <sup>66</sup> Zn | 546.9665: C <sub>14</sub> H <sub>20</sub> <sup>37</sup> Cl <sub>3</sub> N <sub>6</sub> O <sub>6</sub> <sup>66</sup> Zn                  |

#### **Explanation for the peak at m/z = 485.1884.**

**Possible masses for a fragment formed from the molecular ion following the loss of two Cl coordinated to Zn and an –OH from any one Onz ligand, considering isotope distribution due to Zn [<sup>64</sup>Zn (49.2%), <sup>66</sup>Zn (27.7%), <sup>67</sup>Zn (4.0%) & <sup>68</sup>Zn (18.5%)] and the two Cl atoms [<sup>35</sup>Cl (75%) & <sup>37</sup>Cl (25%)].**

**The most probable ones based on relative abundance of Zn and Cl are shown below**

485.0080: C<sub>14</sub>H<sub>20</sub><sup>35</sup>Cl<sub>2</sub>N<sub>6</sub>O<sub>5</sub><sup>64</sup>Zn, 487.0049: C<sub>14</sub>H<sub>20</sub><sup>35</sup>Cl<sub>2</sub>N<sub>6</sub>O<sub>5</sub><sup>66</sup>Zn

and 489.0037: C<sub>14</sub>H<sub>20</sub><sup>35</sup>Cl<sub>2</sub>N<sub>6</sub>O<sub>5</sub><sup>68</sup>Zn.

#### **Explanation for peaks with m/z = 420.0801 and 422.0779**

**Possible masses for a fragment formed from a molecular ion following the loss of –CH<sub>3</sub> and –NO<sub>2</sub> from each Onz ligand along with loss of a –Cl from either Onz ligand on the complex, considering isotope distribution due to the Zn [<sup>64</sup>Zn (49.2%), <sup>66</sup>Zn (27.7%), <sup>67</sup>Zn (4.0%) & <sup>68</sup>Zn (18.5%)] and the Cl atom [<sup>35</sup>Cl (75%) & <sup>37</sup>Cl (25%)].**

**The most probable ones based on relative abundance of Zn and Cl are shown below**

419.9859: C<sub>12</sub>H<sub>19</sub><sup>35</sup>Cl<sub>3</sub>N<sub>4</sub>O<sub>2</sub><sup>64</sup>Zn, 421.9828: C<sub>12</sub>H<sub>17</sub><sup>35</sup>Cl<sub>3</sub>N<sub>4</sub>O<sub>2</sub><sup>66</sup>Zn

and 423.9816:  $C_{12}H_{17}^{35}Cl_3N_4O_2^{68}Zn$

**Fig. S5**

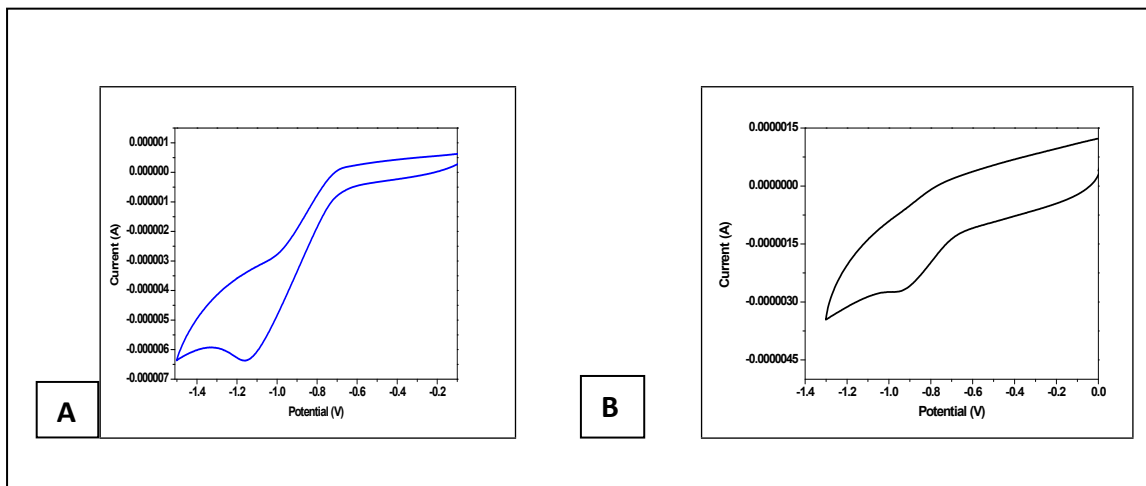

Fig. S5: Cyclic voltammograms of 1 mM  $[Zn(Onz)_2Cl_2]$  in (A) 0.12 M tetrabutyl ammonium bromide in methanol and (B) in 0.12 M KCl in an aqueous solution on a glassy carbon electrode; Scan rate being 100mV/sec.

**Fig. S6**

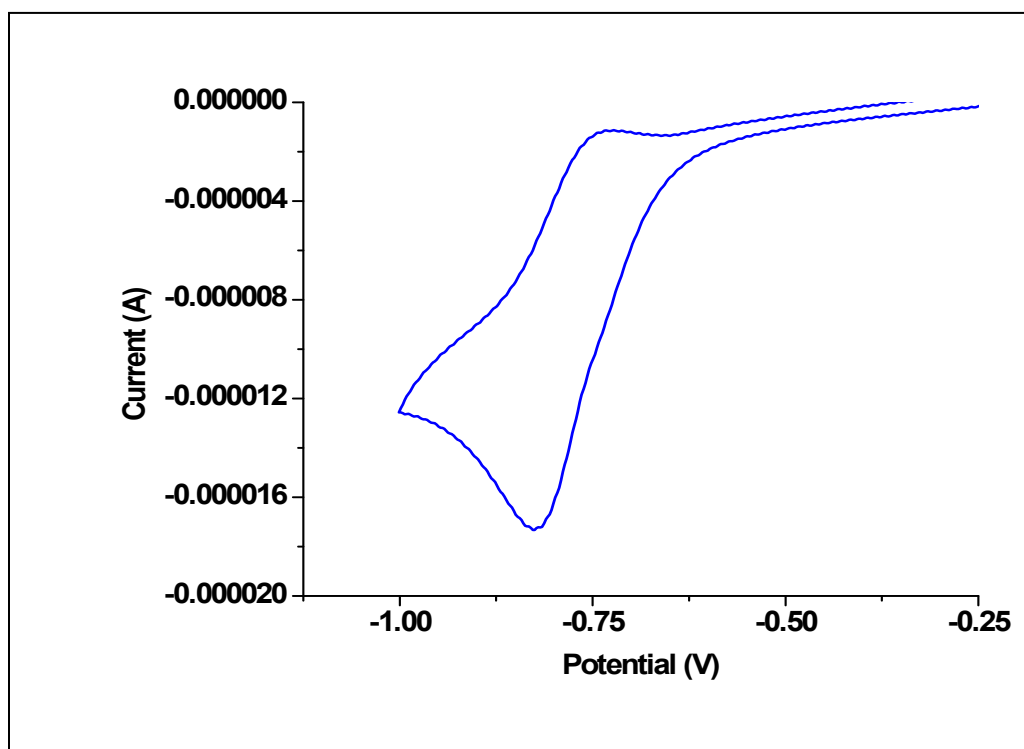



Fig. S6: Cyclic voltammogram of 1 mM Ornidazole showing a single step one electron reduction in 0.12 M KCl in an aqueous - 20% methanol solution on a glassy carbon electrode; Scan rate being 100 mV/sec.

**Fig. S7**

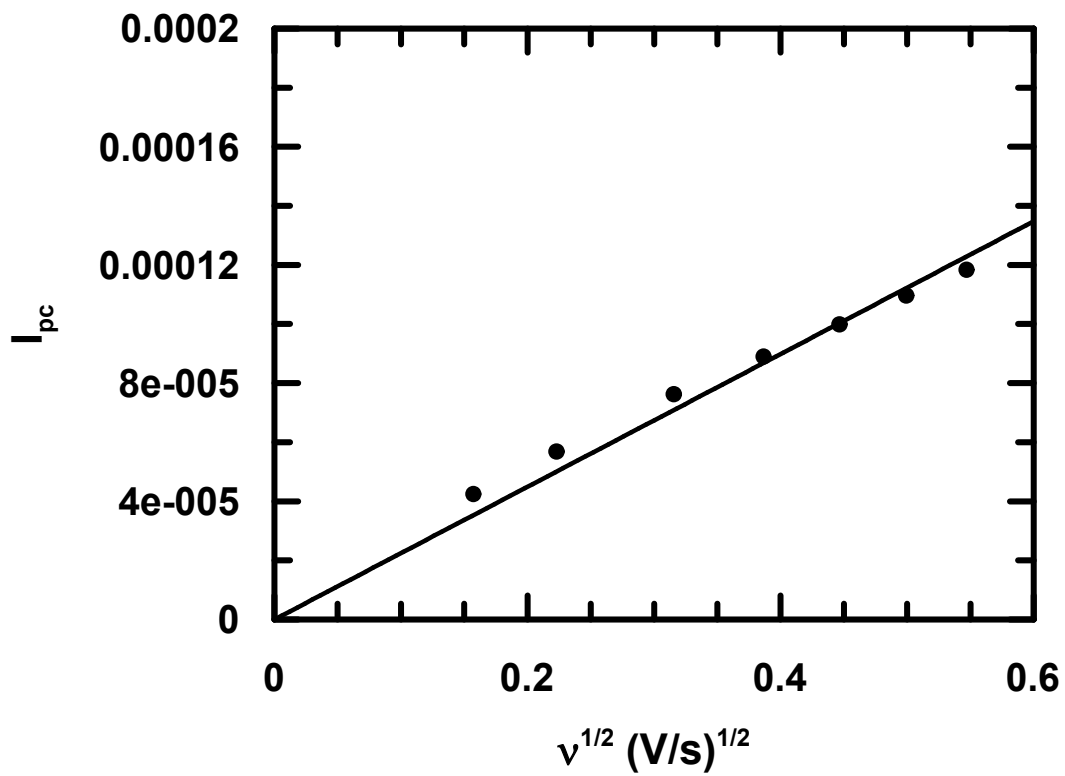

**Fig. S7:** Dependence of cathodic peak current on square root of scan rate for the reduction of  $[\text{Zn}(\text{Onz})_2\text{Cl}_2]$  in aqueous solution.
